# The American Journal of Psychiatry

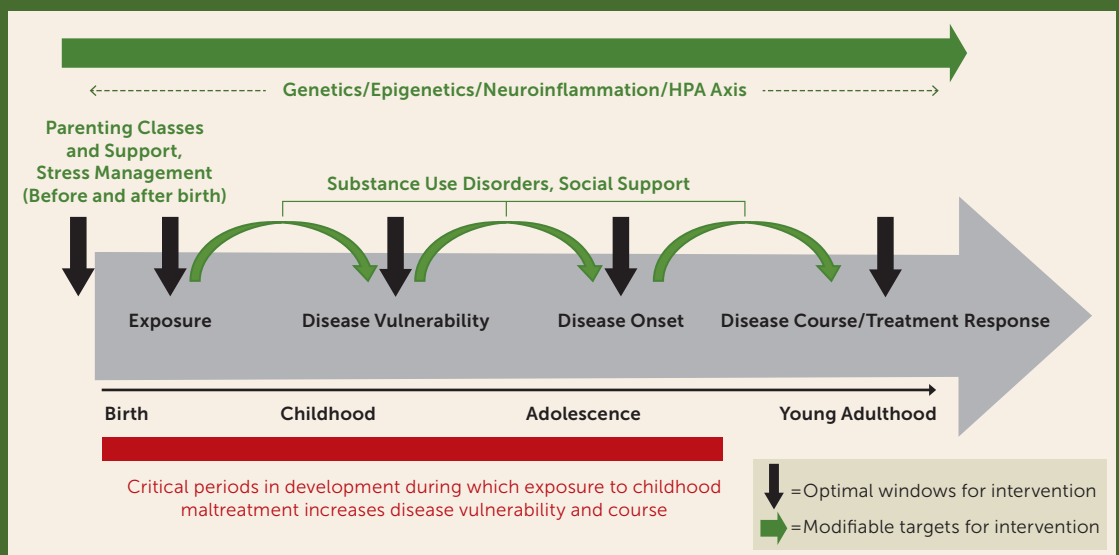

The Devastating Clinical Consequences of Child Abuse and Neglect: Increased Disease Vulnerability and Poor Treatment Response in Mood Disorders

Overview of Alcohol Use Disorder

A Comprehensive Multilevel Analysis of the Bucharest Early Intervention Project: Causal Effects on Recovery From Early Severe Deprivation

Genetic Underpinnings of the Transition From Alcohol Consumption to Alcohol Use Disorder
